# Supplementary material
Source: ML conference proceedings conference paper supplement (https://proceedings.neurips.cc/paper_files/paper/2009/hash/f64eac11f2cd8f0efa196f8ad173178e-Abstract.html)
Supplement: Supplementary file [file f64eac11f2cd8f0efa196f8ad173178e-Supplemental.zip]

---

# Supplementary Material for "Localizing Bugs in Program Executions with Graphical Models"

---

**Laura Dietz**

Max-Planck Institute for Computer Science  
Saarbruecken, Germany  
dietz@mpi-inf.mpg.de

**Valentin Dallmeier**

Saarland University  
Saarbruecken, Germany  
dallmeier@cs.uni-saarland.de

**Andreas Zeller**

Saarland University  
Saarbruecken, Germany  
zeller@cs.uni-saarland.de

**Tobias Scheffer**

Potsdam University  
Potsdam, Germany  
scheffer@cs.uni-potsdam.de

## Derivation of the Predictive Distribution

Given a collection  $\mathcal{G}_m$  of previously seen execution graphs for method  $m$  and a new execution  $G_m = (V_m, E_m, L_m)$ , Bayesian inference determines the likelihood  $p((u, v) \in E_m | V_m, \mathcal{G}_m, \alpha_\psi, \beta_\psi)$  of each of the edges  $(u, v)$ , thus indicating unlikely transitions in the new execution of  $m$  represented by execution graph  $G_m$ . Since we employ independent models for all methods  $m$ , inference can be carried out for each method separately.

In order to infer the probability of an edge, Equation 1 integrates over the model space.

$$p((u, v) \in E_m | V_m, \mathcal{G}_m, \alpha_\psi, \beta_\psi) = \int p((u, v) \in E_m | V_m, \Psi) p(\Psi | \mathcal{G}_m, \alpha_\psi, \beta_\psi) d\Psi \quad (1)$$

According to the Bernoulli graph model, the likelihood of the existence of an edge  $(u, v)$  given the parameter vector  $\Psi$  is a Bernoulli distribution. The distribution is conditioned on existence of the start vertex  $u$  and yields zero probability if the labels do not overlap appropriately:

$$p((u, v) \in E_m | V_m, \Psi) = \begin{cases} \psi_{m, s_1 \dots s_n} & \text{if } u \in V_m, L_m(u) = s_1 \dots s_{n-1}, \text{ and } L_m(v) = s_2 \dots s_n \\ 0 & \text{otherwise.} \end{cases} \quad (2)$$

Corresponding to Figure 3a), the random variable  $b_{G, u, s} = \text{true}$  iff an edge  $(u, v) \in G$  exists in the graph such that  $L(u) = s_1 \dots s_{n-1}$  and  $L(v) = s_2 \dots s_{n-1} s$ . The likelihood of a graph is proportional to the likelihood that all edges in  $E_G$  are generated ( $b_{G, u, s} = \text{true}$ ) and all edges in the complementary set  $\bar{E}_G$  are not (Equation 3). If the start vertex  $u$  is not contained, random variables  $b$  are false with probability 1, thus we can omit them from the product over  $\mathcal{G}$  in Equation 4. This product with shared parameter  $\psi$  yields a Binomial distribution. Since the product of Binomial and Beta distributions yields a reparametrized Beta distribution, we arrive at Equation 5 using counts of successful and failed trials. Shorthand  $\#_{(u, s_n)}^{\mathcal{G}}$  abbreviates the number of graphs  $G \in \mathcal{G}$  with  $b_{G, u, s_n} = \text{true}$  which is the case if an edge  $(u, v)$  between vertices labeled  $L(u) = s_1 \dots s_{n-1}$  and  $L(v) = s_2 \dots s_n$  exists; and  $\#_u^{\mathcal{G}}$  refers to the number of graphs  $G \in \mathcal{G}$  that have a vertex  $u$  labeled  $s_1 \dots s_{n-1}$ , in which case a draw from  $\psi$  is issued.

$$p(\Psi|\mathcal{G}_m, \alpha_\psi, \beta_\psi) \propto p(\Psi|\alpha_\psi, \beta_\psi) \prod_{G \in \mathcal{G}_m} \underbrace{p(V_G)}_{\text{const}} p(E_G|V_G, \Psi) (1 - p(\bar{E}_G|V_G, \Psi)) \quad (3)$$

$$\propto \prod_{s_1 \dots s_{n-1}} \prod_{s \in S} \left( p_\beta(\psi_{m, s_1 \dots s_{n-1} s} | \alpha_\psi, \beta_\psi) \prod_{\substack{G \in \mathcal{G}_m | u \in V_G \\ L(u) = s_1 \dots s_{n-1}}} p(b_{G, u, s} | \psi_{m, s_1 \dots s_{n-1} s}) \right) \quad (4)$$

$$\propto \prod_{s_1 \dots s_n \in (S_m)^n} p_\beta \left( \psi_{m, s_1 \dots s_{n-1} s_n} | \#_{(u, s_n)}^{\mathcal{G}} + \alpha_\psi, \#_u^{\mathcal{G}} - \#_{(u, s_n)}^{\mathcal{G}} + \beta_\psi \right) \quad (5)$$

The predictive distribution in Equation 1 using a Beta-distributed posterior has an analytic solution:

$$p((u, v) \in E_m | V_m, \mathcal{G}_m, \alpha_\psi, \beta_\psi) = \frac{\#_{(u, s_n)}^{\mathcal{G}} + \alpha_\psi}{\#_u^{\mathcal{G}} + \alpha_\psi + \beta_\psi}. \quad (6)$$

By definition, an execution graph  $G$  for an execution contains a vertex if its label is a substring of the execution's trace  $t$ . Likewise, an edge is contained if an aggregation of the vertex labels is a substring of  $t$ . It follows that  $\#_u^{\mathcal{G}} = \#\{t \in T | s_1 \dots s_{n-1} \in t\}$  and  $\#_{(u, s_n)}^{\mathcal{G}} = \#\{t \in T | s_1 \dots s_n \in t\}$ . Equation 6 can be reformulated as in Equation 7 to predict the probability of seeing the code position  $\tilde{s} = s_n$  after a fragment of preceding statements  $\tilde{f} = s_1 \dots s_{n-1}$  using the trace representation of an execution. Thus, it is not necessary to represent execution graphs  $G$  explicitly.

$$p(\tilde{s} | \tilde{f}, T, \alpha_\psi, \beta_\psi) = \frac{\#\{t \in T | \tilde{f} \tilde{s} \in t\} + \alpha_\psi}{\#\{t \in T | \tilde{f} \in t\} + \alpha_\psi + \beta_\psi} \quad (7)$$
